## RESEARCH ARTICLE

# Comparing different metabolic indexes to predict type 2 diabetes mellitus in a five years follow-up cohort: The Baependi Heart Study

Camila Maciel de Oliveira<sup>1,2,3\*</sup>, Jessica Leticia Pavani<sup>4</sup>, Chunyu Liu<sup>5,6</sup>, Mercedes Balcells<sup>7,8</sup>, Robson Capasso<sup>1</sup>, Rafael de Oliveira Alvim<sup>2,9</sup>, Carlos Alberto Mourão-Júnior<sup>10</sup>, José Eduardo Krieger<sup>2</sup>, Alexandre Costa Pereira<sup>2</sup>

**1** Stanford University School of Medicine, Stanford, California, United States of America, **2** Laboratory of Genetics and Molecular Cardiology, Heart Institute (InCor), University of São Paulo Medical School, São Paulo, Brazil, **3** Department of Integrative Medicine, Federal University of Paraná, Curitiba, Brazil, **4** Department of Statistics, Pontificia Universidad Católica de Chile, Santiago, Chile, **5** Framingham Heart Study, Framingham, Massachusetts, United States of America, **6** Department of Biostatistics, Boston University, Boston, Massachusetts, United States of America, **7** Institute for Medical Engineering and Science, Massachusetts Institute of Technology, Cambridge, Massachusetts, United States of America, **8** Bioengineering Department, Institut Químic de Sarrià, Ramon Llull Univ, Barcelona, Spain, **9** Department of Physiological Sciences, Federal University of Amazonas, Manaus, Brazil, **10** Department of Physiology, Federal University of Juiz de Fora, Juiz de Fora, Brazil

\* [cmaciel@stanford.edu](mailto:cmaciel@stanford.edu), [camilamacieloliveira@gmail.com](mailto:camilamacieloliveira@gmail.com)

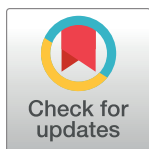

## OPEN ACCESS

**Citation:** de Oliveira CM, Pavani JL, Liu C, Balcells M, Capasso R, Alvim RdO, et al. (2022) Comparing different metabolic indexes to predict type 2 diabetes mellitus in a five years follow-up cohort: The Baependi Heart Study. PLoS ONE 17(6): e0267723. <https://doi.org/10.1371/journal.pone.0267723>

**Editor:** Marcelo Arruda Nakazone, Faculdade de Medicina de São José do Rio Preto, BRAZIL

**Received:** September 9, 2021

**Accepted:** April 13, 2022

**Published:** June 3, 2022

**Copyright:** © 2022 de Oliveira et al. This is an open access article distributed under the terms of the [Creative Commons Attribution License](https://creativecommons.org/licenses/by/4.0/), which permits unrestricted use, distribution, and reproduction in any medium, provided the original author and source are credited.

**Data Availability Statement:** Data cannot be shared publicly because of ethical restrictions. Data are available from the Heart Institute, Sao Paulo University Laboratory of Genetics and Molecular Cardiology (contact via +55(11)2661 5579), or from the corresponding author, for researchers who meet the criteria for access to confidential data.

**Funding:** The current research was supported by grants from NIH/NHLBI (R01HL141881), São

## Abstract

This study evaluates the association of anthropometric indexes and the incidence of type 2 diabetes mellitus (T2DM) after a 5-year follow-up. This analysis included 1091 middle-aged participants (57% women, mean age  $47 \pm 15$  years) who were free of T2DM at baseline and attended two health examinations cycles [cycle 1 (2005–2006) and cycle 2 (2010–2013)]. As expected, the participants who developed T2DM after five years (3.8%) had the worst metabolic profile with higher hypertension, dyslipidemia, and obesity rates. Besides, using mixed-effects logistic regression and adjustment for sex, age, and glucose, we found that one unit increase in body adiposity index (BAI) was associated with an 8% increase in their risk of developing T2DM (odds ratio [OR] = 1.08 [95% CI, 1.02–1.14]) and visceral adiposity index (VAI) was associated with a risk increase of 11% (OR = 1.11 [95% CI, 1.00–1.22]). Moreover, a one-unit increase in the triglycerides-glucose index (TyG) was associated with more than four times the risk of developing T2DM (OR = 4.27 [95% CI, 1.01–17.97]). The interquartile range odds ratio for the continuous predictors showed that TyG had the best discriminating performance. However, when any of them were additionally adjusted for waist circumference (WC) or even body mass index (BMI), all adiposity indexes lost the effect in predicting T2DM. In conclusion, TyG had the most substantial predictive power among all three indexes. However, neither BAI, VAI, nor TyG were superior to WC or BMI for predicting the risk of developing T2DM in a middle-aged normoglycemic sample in this rural Brazilian population.

Paulo Research Foundation (FAPESP), and Hospital Samaritano Society (grant no. 25000.180.664/2011-35) through the Ministry of Health to Support Program Institutional Development of the Unified Health System (SUS-PROADI). M.B. was partially funded by Spain Minister of Economy (SAF2017-84773-C2-1-R), Fundacion Empresas IQS, and the Global CoCreation Lab, Inc (Miami, FL).] There was no additional external funding received for this study. The funders had no role in study design, data collection, and analysis, decision to publish, or preparation of the manuscript.

**Competing interests:** The authors have declared that no competing interests exist.

**Abbreviations:** BAI, body adiposity index; BMI, body mass index; CI, Confidence interval; DBP, diastolic blood pressure; FPG, fasting plasma glucose; IQR, interquartile range odds ratio; OR, odds ratio; SBP, systolic blood pressure; SD, standard deviation; T2DM, type 2 diabetes mellitus; TyG, triglycerides-glucose index; VAI, visceral adiposity index; WC, waist circumference.

## Introduction

Type 2 diabetes mellitus (T2DM) is a problem approaching epidemic proportions globally. Data from the International Diabetes Federation indicated 463 million cases in 2019, expecting a 51% increase by 2045 [1]. Such a problem is even more severe, considering that an estimated 50% of cases remain undiagnosed [1]. Amid this global public health problem, Brazil ranks fifth in diabetic individuals in the world. About 16.8 million Brazilian adults are diagnosed with T2DM, which means one in nine has the disease. The causes for such a high number of cases have not been appropriately characterized, although many studies indicate a strong association with diet quality, lack of physical activity, and obesity. In Brazil, obesity is one of the most critical risk factors for various diseases [2], including T2DM.

Then the scientific community has been looking for clinical methods to prevent the T2DM onset. Previous studies have explored the association between some anthropometric indexes and T2DM, besides recognized obesity measurements such as waist circumference (WC) or body mass index (BMI). Developed by Bergman et al. [3], body adiposity index (BAI) is one of the most investigated proxies, showing to be associated with T2DM [4–6]. Alternatively, the visceral adiposity index (VAI) has gained prominence concerning the risk of metabolic diseases [7–10]. Another marker, which has proved essential in the study of T2DM, is the triglyceride-glucose index (TyG) [11–15].

Although numerous clinical studies have described the associations between these anthropometric indexes and the incidence of T2DM in European descent, these proxies have not been investigated in the Brazilian population. Ethnic differences may influence the discriminatory power of anthropometric markers in assessing the risk of T2DM [4, 16]. Therefore, in a longitudinal cohort study, our main interest was investigating the associations of BMI, WC, BAI, VAI, and TyG with the incidence of T2DM in a middle-aged normoglycemic sample in a Brazilian rural population. Also, our research aimed to identify the index that had the highest predictive power to predict T2DM.

## Methods

The Baependi Heart Study (BHS) started in 2005 in the southeast of Brazil [17]. A small town—Baependi—was chosen for the data collection process of this cohort. The individuals were randomly invited into the study (both sex and ages 18–102 years). Once recruited, the participants were examined every five years to obtain their demographic variables, medical history, blood samples, and clinical exams [17, 18]. At present, the cohort study consists of three health examination cycles. For this study we analyzed data from cycle 1 (2005–2006;  $n = 1712$ ; 119 families) and cycle 2 (2010–2013;  $n = 3017$ ; 127 families). In cycle 2, we have included participants that at that time were older than 17 years old and other relatives from original families that had not been enrolled previously in cycle 1. Also, some new families were included in cycle 2 ( $n = 9$ ).

For this analysis, the final sample consisted of 1091 individuals, considering those participants that lost follow-up or died between cycles 1 and 2 ( $n = 422$ ), missing data ( $n = 86$ ), and also excluding any participant with the diagnosis of T2DM in the baseline ( $n = 113$ ).

Based on the newly T2DM diagnosis in cycle 2, the eligible participants were divided into two groups: (i) Diabetes Free (those who remained without T2DM) and (ii) Incident Diabetes (those who developed T2DM). T2DM was defined by the presence of fasting plasma glucose  $\geq 126$  mg/dL or the use of any hypoglycemic drugs [19].

Initially, all the participants answered a questionnaire [17, 18] in which they stated whether they were users of any medication to control blood glucose levels, blood pressure, and lipids. Additionally, all participants were referred for blood screening [18] regardless of answers to

these questions. Besides that, blood pressure and anthropometric parameters (weight, height, and waist circumference) were measured [18].

Increased waist circumference (WC) was defined as >88 cm for women and >102 cm for men [20]. Hypertension, when mean SBP  $\geq$  140 mmHg or DBP  $\geq$  90 mmHg or antihypertensive drug use [20]. Dyslipidemia treatment was defined when at least one class of lipid-lowering drugs was used [20].

The remaining anthropometric indexes—BAI, VAI, and TyG—were calculated using the following Equations [3, 7, 12]:

$$\text{BAI} = (\text{Hip Circumference (cm)}/\text{Height}^{1.5} \text{ (m)} - 18)$$

VAI

$$\text{Males} = \left\{ \frac{\text{waist circumference}}{[39.68 + (1.88 * \text{body mass index})]} \right\} \\ * \left( \frac{\text{tryglicerides}}{1.03} \right) * (1.31/\text{HDL} - c)$$

$$\text{Females} = \left\{ \frac{\text{waist circumference}}{[39.58 + (1.89 * \text{body mass index})]} \right\} \\ * \left( \frac{\text{tryglicerides}}{0.81} \right) * (1.52/\text{HDL} - c)$$

$$\text{TyG} = \ln[(\text{Triglycerides} * \text{Glucose})]/2$$

Continuous variables were normally distributed and were expressed as the mean  $\pm$  SD. Categorical variables were expressed as percentages. Both were used for describing the clinical characteristics in cycles 1 and 2. We performed analysis using the mixed-effects logistic regression to evaluate the association between some indexes—BAI, VAI, and TyG—and the incidence of T2DM. Mixed-effects logistic regression was also used to assess the risk for developing T2DM. The regression model was carried out with BAI, VAI, or TyG as the main predictor variables (adjusted for sex and age, Model 1) or also for glucose (Model 2) and another adiposity index (Model 3). Considering the kinship relations among individuals, we also took into account family as a random effect. Results from the mixed-effects logistic regression were also reported as odds ratios per interquartile range (IQR-OR) with their 95% confidence intervals [21]. In the logistic regression model, we chose to calculate the odds ratio (OR) relative to the interquartile range (IQR) because we are comparing indices that are not measured on the same scale. In this way, when we use quartiles (in this case, the 25th and 75th percentiles), we standardize the measures, making them commensurate with each other. This advantage allows comparisons to be made, which is our primary objective. Conversely, in doing so, the clinical interpretation of the regression model is somewhat impaired, as what the model will tell us is how much the risk increases for each unit that the IQR increases. Although the clinical application of this information is not straightforward (since we do not routinely use the IQR in health practice), this artifice allowed us to compare the indices, as the quartiles will always be the values that divide the values into four classes, regardless of the scale of measure. The R Studio software (Version 1.3.1093) was used for analyses [22] and the level of significance was set at 5%.

The Baependi Heart Study has an ethics approval (Hospital das Clínicas, SDC 3485/10/074, University of São Paulo). Each participant consented to be part of this cohort, previously the data collection, by assigning a written informed consent. The data were analyzed anonymously.

**Table 1. Clinical characteristics at baseline (Cycle 1) and 5-year follow-up (Cycle 2) in the normoglycemic sample of the Baependi Heart Study.**

| Variable                   | Cycle 1      | Cycle 2             |                         |
|----------------------------|--------------|---------------------|-------------------------|
|                            |              | Diabetes-free group | Incident Diabetes group |
| n                          | 1091         | 1049 (96.2%)        | 42 (3.8%)               |
| Age, years                 | 42 ± 15      | 47 ± 15             | 57 ± 12**               |
| Sex (% men)                | 43           | 43                  | 33                      |
| Hypertension (%)           | 31           | 38                  | 70**                    |
| Increased WC (%)           | 27           | 39                  | 61*                     |
| Obesity                    | 12           | 20                  | 39*                     |
| Dyslipidemia treatment (%) | 3            | 7                   | 22**                    |
| Current smoke (%)          | 14           | 12                  | 12                      |
| SBP, mmHg                  | 125 ± 19     | 126 ± 16            | 131 ± 16                |
| DBP, mmHg                  | 79 ± 11      | 77 ± 10             | 79 ± 11                 |
| BMI, kg/m <sup>2</sup>     | 24 ± 5       | 26 ± 5              | 29 ± 5**                |
| WC, cm                     | 87 ± 12      | 91 ± 11             | 100 ± 11**              |
| Fasting glucose, mg/dL     | 87 ± 17      | 90 ± 10             | 141 ± 51**              |
| Total cholesterol, mg/dL   | 179 ± 48     | 198 ± 40            | 194 ± 43                |
| HDL-cholesterol, mg/dL     | 57 ± 16      | 48 ± 13             | 48 ± 11                 |
| LDL-cholesterol, mg/dL     | 97 ± 43      | 125 ± 34            | 114 ± 36                |
| Triglycerides, mg/dL       | 129 ± 70     | 128 ± 65            | 162 ± 88*               |
| TyG                        | 4.60 ± 0.26  | 4.62 ± 0.24         | 4.93 ± 0.35**           |
| BAI                        | 28.56 ± 6.54 | 29.26 ± 6.10        | 32.30 ± 6.27*           |
| VAI                        | 4.04 ± 2.70  | 4.87 ± 3.22         | 6.58 ± 4.68*            |

SBP, systolic blood pressure; DBP, diastolic blood pressure; BMI, body mass index; WC, waist circumference; TyG, triglycerides-glucose index; BAI, body adiposity index; VAI, visceral adiposity index. Hypertension: systolic blood pressure  $\geq 140$  mmHg, diastolic blood pressure  $\geq 90$  mmHg, and/or anti-hypertensive drug use. Dyslipidemia treatment: percentage of individuals who used at least one class of lipid-lowering drug. Increased WC,  $> 88$  cm for women and  $> 102$  cm for men. Continuous data are expressed as the mean  $\pm$  standard deviation and categorical data are expressed as percentage.

\* ( $p < 0.05$ )

\*\* ( $p < 0.001$ ) Incident Diabetes versus Diabetes Free in Cycle 2

Health examination was conducted at Cycle 1 (2005 to 2006) and Cycle 2 (2010 to 2013).

Baependi Heart Study, Brazil (2005–2013)

<https://doi.org/10.1371/journal.pone.0267723.t001>

## Results

After a 5-year follow-up, 3.8% of the normoglycemic group at baseline developed T2DM (57% women, mean age  $57 \pm 12$  years) (Table 1). The worse metabolic profile was shown in the Diabetes Incident group, which was older and had a higher proportion of obesity, increased WC, hypertension, and lipid-lowering drugs. Mean levels of triglycerides, BAI, VAI, and TyG, were also higher in the group that developed T2DM.

The best combination to predict the incidence of T2DM, according to the area under the curve (AUC) goodness of fit assessment in binary logistic regression, was sex, age, BAI, VAI, and TyG in the same model (0.891) or sex, age, and WC together (0.891). Then, a complete model (sex, age, BAI, VAI, and TyG) was carried out to verify the significance of those indexes (Table 2). We identified that BAI was significantly different between participants with T2DM and free of the disease ( $p$ -value  $< 0.05$ ), even adjusted for age, sex, and glucose. However, the model did not suffice when BAI was additionally adjusted for WC or BMI.

Then, some other models for each index were carried out. In Table 3, Model 1 accounts for age and sex; Model 2, age, sex, and glucose; Model 3, age, sex, glucose, or another obesity

**Table 2. AUC used to evaluate the goodness of fit in logistic regression in different models.**

|            | Covariates | Age and Sex       | Age, Sex, FBG     | Sex, Age, FBG, BMI | Sex, Age, FBG, WC |
|------------|------------|-------------------|-------------------|--------------------|-------------------|
| Predictors | VAI        | 1.00 (0.86–1.18)  | 1.04 (0.88–1.24)  | 1.04 (0.87–1.25)   | 1.02 (0.85–1.23)  |
|            | BAI        | 1.07 (1.01–1.14)* | 1.08 (1.01–1.14)* | 0.95 (0.85–1.06)   | 0.99 (0.90–1.08)  |
|            | TyG        | 4.00 (0.52–30.70) | 2.13 (0.19–23.59) | 1.38 (0.11–17.08)  | 1.77(0.14–21.96)  |

Dependent variable is T2DM, Independent variable is VAI, BAI or TyG. Covariates are age, sex, FBG, BMI and WC.

BAI, body adiposity index; TyG, triglycerides-glucose index; VAI, visceral adiposity index; WC, waist circumference; BMI, body mass index; FBG, fasting blood glucose

The results are expressed by OR, odds ratio; CI, confident interval;

\*( $p < 0.05$ )

Health examination was conducted at Cycle 1 (2005 to 2006) and Cycle 2 (2010 to 2013).

Baependi Heart Study, Brazil (2005–2013).

<https://doi.org/10.1371/journal.pone.0267723.t002>

measurement (BAI, VAI, or TyG). Using mixed-effects logistic regression, we observed that BAI, VAI, and TyG were significantly different between participants with T2DM and free of the disease when adjusted for sex and age (Model 1). In model 2, we could show that the elevation of each unit represented an increased risk of 8% for developing diabetes when BAI was analyzed. (odds ratio [OR] = 1.08 [95% CI, 1.02–1.14];  $p < 0.05$ ). Besides, when analyzing TyG in model 2, we noticed that one unit increase in TyG was associated with four times the risk of developing T2DM (OR = 4.27 [95% CI, 1.01–17.97];  $p < 0.05$ ), even adjusted for glucose. In model 3, none of the indexes—BAI, VAI, and TyG—could suffice when adjusted for WC or BMI. Oppositely, when we analyzed WC or BMI, both were significant in all models.

To compare the predictive power of these indexes, we calculated IQR-OR and their respective confidence intervals (Table 4). Such an approach allowed us to reach predictors measured on different scales. After performed log-transformation followed by conversion to the exponential form, IQR-OR was 1.35 (95% CI, 0.30–6.04;  $p > 0.05$ ) for TyG and 1.16 for VAI (95% IC, 1.04–1.30;  $p > 0.05$ ), indicating that an IQR was associated with an increased risk for developing T2DM of 35% and 16%, respectively.

## Discussion

This study analyzed the association between three main adiposity indexes—BAI, TyG, and VAI—and T2DM in a Brazilian population. In particular, the Baependi Heart Study included

**Table 3. Odds ratio in three different models of binary logistic regression (dependent variable is T2DM).**

|            | Covariates | Model 1                   | Model 2                   | Model 3                                                           |                         |                           |                  |                   |
|------------|------------|---------------------------|---------------------------|-------------------------------------------------------------------|-------------------------|---------------------------|------------------|-------------------|
|            |            | Age and Sex               | Age, Sex, and Glucose     | Age, Sex, Glucose and obesity indexes (VAI, BAI, TyG, WC and BMI) |                         |                           |                  |                   |
|            |            |                           |                           | VAI                                                               | BAI                     | TyG                       | WC               | BMI               |
| Predictors | WC         | <b>1.06 (1.03–1.09)**</b> | <b>1.06 (1.03–1.09)**</b> | <b>1.06 (1.02–1.09)*</b>                                          | <b>1.06(1.02–1.11)*</b> | <b>1.06(1.04–1.08)**</b>  | -                | 1.04 (0.98–1.10)  |
|            | BMI        | <b>1.13 (1.06–1.20)**</b> | <b>1.12 (1.06–1.20)**</b> | <b>1.12 (1.05–1.20)*</b>                                          | <b>1.17(1.04–1.32)*</b> | <b>1.12 (1.05–1.20)**</b> | 1.04 (0.91–1.19) | -                 |
|            | VAI        | <b>1.11 (1.0–1.22)*</b>   | 1.11 (1.0–1.22)           | -                                                                 | 1.09(0.98–1.20)         | 1.05 (0.88–1.25)          | 1.06 (0.95–1.18) | 1.07 (0.96–1.18)  |
|            | BAI        | <b>1.08 (1.02–1.14)*</b>  | <b>1.08 (1.02–1.14)*</b>  | <b>1.08 (1.02–1.14)*</b>                                          | -                       | <b>1.07 (1.01–1.14)*</b>  | 0.99 (0.91–1.08) | 0.96(0.86–1.16)   |
|            | TyG        | <b>4.55 (1.21–17.16)*</b> | <b>4.27 (1.01–17.97)*</b> | 2.4 (0.21–27.37)                                                  | 3.22(0.73–14.21)        | -                         | 2.25(0.50–10.09) | 2.23 (0.49–10.04) |

Model 1, accounting for Age and Sex; Model 2, accounting for Age, Sex and Fasting Blood Glucose; Model 3, accounting for Age, Sex, Fasting Blood Glucose and each measurement of obesity.

\*( $p < 0.05$ )

\*\* ( $p < 0.001$ )

<https://doi.org/10.1371/journal.pone.0267723.t003>

**Table 4. Variables associated with diabetes mellitus in the Baependi Heart Study.**

| Variable | Beta  | OR [95% CI]       | IQR-OR [95% CI]   | <i>p</i> -value |
|----------|-------|-------------------|-------------------|-----------------|
| Sex      | -1.24 | 0.29 [0.11, 0.79] | 0.54 [0.20, 1.48] | 0.23            |
| Age      | 0.04  | 1.04 [0.73, 1.48] | 2.25 [2.20, 2.30] | <b>0.003</b>    |
| WC       | 0.06  | 1.06 [0.65, 1.74] | 2.57 [2.47, 2.68] | <b>0.006</b>    |
| Glucose  | 0.02  | 1.02 [0.72, 1.43] | 1.44 [1.41, 1.47] | 0.14            |
| BAI      | -0.01 | 0.99 [0.56, 1.74] | 0.90 [0.83, 0.98] | 0.78            |
| Sex      | -0.83 | 0.43 [0.21, 0.88] | 0.66 [0.33, 1.34] | 0.25            |
| Age      | 0.03  | 1.03 [0.72, 1.48] | 2.12 [2.07, 2.17] | <b>0.01</b>     |
| WC       | 0.06  | 1.06 [0.75, 1.50] | 2.50 [2.43, 2.58] | <b>0.0002</b>   |
| Glucose  | 0.01  | 1.01 [0.70, 1.45] | 1.13 [1.10, 1.15] | 0.67            |
| TyG      | 0.81  | 2.25 [1.53, 3.31] | 1.35 [0.30, 6.04] | 0.28            |
| Sex      | -0.89 | 0.41 [0.20, 0.85] | 0.64 [0.31, 1.33] | 0.23            |
| Age      | 0.03  | 1.03 [0.72, 1.49] | 2.18 [2.13, 2.23] | <b>0.01</b>     |
| WC       | 0.05  | 1.06 [0.74, 1.50] | 2.38 [2.31, 2.45] | <b>0.0003</b>   |
| Glucose  | 0.01  | 1.01 [0.79, 1.43] | 1.36 [1.34, 1.39] | 0.22            |
| VAI      | 0.06  | 1.06 [0.79, 1.42] | 1.16 [1.04, 1.30] | 0.32            |

Logistic regression was utilized to evaluate associations between diabetes mellitus (outcome) with predictor variables in a multivariate model. WC, waist circumference; BAI, body adiposity index; TyG, triglycerides-glucose index; VAI, visceral adiposity index; OR, odds ratio; CI, confident interval; IQR-OR, odds ratio for interquartile range.

Diabetes mellitus: diagnosis was established in patients with fasting glucose equal to or greater than 126 mg/dL, or in patients who were under the use of anti-diabetic drugs.

Predictive variable: BAI, TyG, and VAI, respectively.

Control variables: sex, age, glucose levels, and WC.

Health examination was conducted at Cycle 1 (2005 to 2006) and Cycle 2 (2010 to 2013).

Baependi Heart Study, Brazil (2005–2013).

<https://doi.org/10.1371/journal.pone.0267723.t004>

a rural Brazilian sample. To the best of our knowledge, the ability of these three clinical markers to predict T2DM in a Brazilian study with a large sample size has not been previously performed. Overall, our findings corroborated numerous studies which have demonstrated the importance of the anthropometric indexes in different populations, highlighting BAI, TyG, and VAI as quite useful. Such indexes can be used as good predictors for T2DM in Asian [8–11, 23], American [3], European [5], and Latin American populations [4, 6, 14, 16]. In Brazil, both Flor and Campos [24] and Freitas and Moraes [25] showed a strong association between T2DM and obesity, considering different Brazilian samples. Moreover, in the same direction as the findings of Bergman et al. [3] and López et al. [5], Oliveira et al. [6] had already pointed out the role of the body adiposity index to predict T2DM risk in the Baependi population.

In agreement with some reports [6, 14], we described a significant association between the three index variables—BAI, TyG, and VAI—and the incidence of T2DM when adjusted for age and sex. As shown before, we identified that one added unit in each index implies a significant increase in the risk of developing T2DM. However, a straight comparison among their respective OR values is not indicated due to the different scales of variables. Hence, we calculated the IQR-OR, which is comparable in magnitude for all the risk factors. The IQR describes the distance between the 25th and 75th percentiles. Then, the advantage of using IQR as a scaling factor is that, unlike the standard deviation, it reflects the values of the predictor that are relatively well-represented in the sample [21]. The resulting regression coefficient compares a value in the middle of the upper half of the predictor distribution to a value in the middle of the lower half of the distribution. To date, we know of only one study that compared the



predictive power of TyG, BMI, and WC for prediabetes or diabetes. This study demonstrated that the TyG was best able to identify prediabetes in either sex, suggesting that compared to the other parameters (BMI and WC), the TyG has the best discriminative power to predict prediabetes in the whole population [16]. Using statistical modeling and IQR measure (Similar to Ramírez-Vélez et al. [16]), our study showed that TyG was not superior to WC or BMI for predicting the risk of developing T2DM.

The superiority of TyG over BAI and VAI is likely to be clinically explained by the fact that it is associated with insulin resistance, which is known to be a determining factor in the etio-pathogenesis and pathophysiology of T2DM [15, 26]. In epidemiological and clinical studies, the advantage of the TyG index is less costly than other insulin markers and also due to glucose and triglycerides are biochemical tests routinely performed in the primary care setting [15].

Regarding clinical applicability, our objective was to identify the highest precision and accuracy index that allows physicians to make clinical decisions and apply preventive measures in individuals with increased risk for T2DM. In addition, the three indexes studied are easy to obtain from clinical and laboratory data that are generally requested in the routine of follow-up consultations. Thus, we suggest the TyG index as a complementary marker for assessing T2DM in clinical practice and future epidemiological studies among Brazilian adults.

Conversely, TyG (as well as the other adiposity indexes) loses its predictive value when the statistical models are adjusted for conventional measures of body fat (BMI and WC). If this assumption becomes reproducible in new similar studies, it will be plausible to surmise that these easily obtainable measures in clinical practice remain valuable. From a clinical and pathophysiological point of view, this makes sense since it corroborates the thesis that obesity is probably the major risk factor for the development of T2DM. Indeed, this fact was expected in our study since we evaluated patients over a 5-year interval, using BMI and WC as covariates, in as much as the expectation is that weight gain occurs over time.

Furthermore, we are aware that our findings are particular to a rural population and that other studies are likely to have different risk factors. For instance, it is known that the adult's ethnicity [4, 16] can influence the anthropometric indicators associated with glycemic status. Such influence could impact their association with T2DM. Further investigations are warranted to provide reference values applicable to different ethnic populations.

This study has a few limitations. First, all participants live in Baependi, a small town with great rural activity in South-eastern Brazil. Therefore, these results may not be easily generalized to represent the overall Brazilian population. Second, this work was based on an observational study where the participant makes a single visit per cycle. So, analogous to other studies, T2DM was defined based on a single fasting blood glucose measurement or a report of hypoglycemic drug use.

To sum up, our results show that TyG has a more significant potential than VAI and BAI as a predictor of T2DM. However, measures easily obtained in clinical practice (BMI and WC) seem to maintain their hegemony.

## Acknowledgments

We are grateful to the staff for data collection in the Baependi Heart Study. We also thank all the cohort participants over 15 years of follow-up.

## Author Contributions

**Conceptualization:** Camila Maciel de Oliveira, Rafael de Oliveira Alvim, José Eduardo Krieger, Alexandre Costa Pereira.

**Data curation:** Camila Maciel de Oliveira, Jessica Leticia Pavani, Rafael de Oliveira Alvim, Carlos Alberto Mourão-Júnior, José Eduardo Krieger, Alexandre Costa Pereira.

**Formal analysis:** Camila Maciel de Oliveira, Jessica Leticia Pavani, Rafael de Oliveira Alvim, Carlos Alberto Mourão-Júnior.

**Funding acquisition:** Camila Maciel de Oliveira, José Eduardo Krieger, Alexandre Costa Pereira.

**Investigation:** Camila Maciel de Oliveira, Chunyu Liu, Mercedes Balcells, Robson Capasso, Rafael de Oliveira Alvim, Carlos Alberto Mourão-Júnior, José Eduardo Krieger, Alexandre Costa Pereira.

**Methodology:** Camila Maciel de Oliveira, Rafael de Oliveira Alvim, José Eduardo Krieger, Alexandre Costa Pereira.

**Project administration:** Camila Maciel de Oliveira, Rafael de Oliveira Alvim, José Eduardo Krieger, Alexandre Costa Pereira.

**Resources:** José Eduardo Krieger, Alexandre Costa Pereira.

**Software:** Alexandre Costa Pereira.

**Supervision:** Camila Maciel de Oliveira, Robson Capasso, Rafael de Oliveira Alvim, José Eduardo Krieger, Alexandre Costa Pereira.

**Validation:** Camila Maciel de Oliveira, Rafael de Oliveira Alvim, José Eduardo Krieger, Alexandre Costa Pereira.

**Visualization:** José Eduardo Krieger, Alexandre Costa Pereira.

**Writing – original draft:** Camila Maciel de Oliveira, Jessica Leticia Pavani.

**Writing – review & editing:** Chunyu Liu, Mercedes Balcells, Robson Capasso, Rafael de Oliveira Alvim, Carlos Alberto Mourão-Júnior, José Eduardo Krieger, Alexandre Costa Pereira.

## References

1. IDF Diabetes Atlas. <https://diabetesatlas.org/en/resources/> (accessed on 07 July 2020).
2. Malta DC, Felisbino-Mendes MS, Machado IE, Passos VMA, Abreu DMX, Ishitani LH, et al. Risk factors related to the global burden of disease in Brazil and its Federated Units. *Rev Bras Epidemiol*, 2015; PMID: 28658385
3. Bergman RN, Buchanan TA, Stefanovski D, Sumner AE, Reynolds JC, Sebring NG, et al. A better index of body adiposity. *Obesity*, 2011; <https://doi.org/10.1038/oby.2011.38> PMID: 21372804
4. Alvim RO, Oliveira CM, Mourao-Junior CA, Mill JG, Krieger JE, Pereira AC. BMI, WC, BAI, and risk for type 2 diabetes in two populations in Brazil: General and Amerindian. *PlosOne*, 2014.
5. López AA, Cespedes ML, Vicente T, Tomas M, Bennasar-Veny M, Tauler P, et al. Body adiposity index utilization in a Spanish Mediterranean population: Comparison with the body mass index. *PlosOne*. 2012; <https://doi.org/10.1371/journal.pone.0035281> PMID: 22496915
6. Oliveira CM, Pavani J, Krieger J, Alvim RO, Mourão CA, Pereira AC. Body adiposity index accessing the type 2 diabetes mellitus development risk: the Baependi Heart Study. *Diabetology & Metabolic Syndrome*, 2019; <https://doi.org/10.1186/s13098-019-0467-1> PMID: 31485273
7. Amato MC, Giordano C, Galia M, Criscimanna A, Vitabile S, Midiri M, et al. Visceral adiposity index a reliable indicator of visceral fat function associated with cardiometabolic risk. *Diabetes Care*, 2010; <https://doi.org/10.2337/dc09-1825> PMID: 20067971
8. Hameed EK, AbdulQahar ZH. Visceral adiposity index in female with type 2 diabetic mellitus and its association with the glycemic control. *Diabetes & Metabolic Syndrome: Clinical Research & Reviews*, 2019; <https://doi.org/10.1016/j.dsx.2019.01.039> PMID: 31336471



9. Nusrianto R, Tahapary DL, Soewondo P. Visceral adiposity index as a predictor for type 2 diabetes mellitus in Asian population: A systematic review. *Diabetes & Metabolic Syndrome: Clinical Research & Reviews*, 2019; <https://doi.org/10.1016/j.dsx.2019.01.056> PMID: 31336469
10. Nusrianto R, Ayundini G, Kristanti M, Riyadina W, Tahapary DL, Soewondo P. Visceral adiposity index and lipid accumulation product as a predictor of T2DM: The Bogor cohort study of non-communicable diseases risk factors. *Diabetes Res Clin Pract*, 2019; <https://doi.org/10.1016/j.diabres.2019.107798> PMID: 31330161
11. Chamroonkiadtikun P, Ananchaisarp T, Wanichanon W. The triglyceride-glucose index, a predictor of type 2 diabetes development: A retrospective cohort study. *Prim. Care Diab.* 2019; <https://doi.org/10.1016/j.pcd.2019.08.004> PMID: 31466834
12. Guerrero-Romero F, Simental-Mendía LE, González-Ortiz M, Martínez-Abundis E, Ramos-Zavala MG, Hernández-González SO, et al. The Product of Triglycerides and Glucose, a Simple Measure of Insulin Sensitivity. Comparison with the Euglycemic-Hyperinsulinemic Clamp. *J. Clin. Endocrinol. Metab*, 2010; <https://doi.org/10.1210/jc.2010-0288> PMID: 20484475
13. Low S, Khoo KCJ, Irwan B, Sum CF, Subramaniam T, Lim SC, et al. The role of triglyceride glucose index in development of type 2 diabetes mellitus. *Diabetes Research and Clinical Practice*. 2018; <https://doi.org/10.1016/j.diabres.2018.06.006> PMID: 29936253
14. Oliveira CM, Pavani J, Liu C, Alvim RO, Balcells M, Mourão CA, et al. Triglyceride glucose index as a tool to motivate early lifestyle modification in young adults at diabetes risk: The Baependi Heart Study. *Preventive Medicine Reports*, 2020; <https://doi.org/10.1016/j.pmedr.2020.101172> PMID: 32874826
15. Sanchez-Garcia A, Rodriguez-Gutierrez R, Mancillas-Adame L, Gonzalez-Nava V, Diaz Gonzalez-Colmenero A, Solis RC, et al. Diagnostic Accuracy of the Triglyceride and Glucose Index for Insulin Resistance: A Systematic Review. *International journal of endocrinology*, 2020; <https://doi.org/10.1155/2020/4678526> PMID: 32256572
16. Ramírez-Vélez R, Pérez-Sousa MÁ, Cano-Gutierrez CA, González-Ruiz K, Schmidt-RioValle J, Correa-Rodríguez M, et al. Obesity—and Lipid—Related Parameters in the Identification of Older Adults with a High Risk of Prediabetes According to the American Diabetes Association: An Analysis of the 2015 Health, Well-Being, and Aging Study. *Nutrients*, 2019; <https://doi.org/10.3390/nu11112654> PMID: 31689977
17. Egan KJ, Schantz M, Negrão AB, Santos HC, Horimoto AR, Duarte NE, et al. Cohort profile the Baependi Heart Study a family based, highly admixed cohort study in a rural Brazilian town. *BMJ Open*, 2016; <https://doi.org/10.1136/bmjopen-2016-011598> PMID: 27797990
18. Oliveira CM, Andrade M, Pereira AC, Soler JM, Krieger JE. Heritability of cardiovascular risk factors in a Brazilian population: Baependi Heart Study. *BMC Med Genet*, 2008; <https://doi.org/10.1186/1471-2350-9-32> PMID: 18430212
19. Padilha K, Venturini G, Pires TF, Horimoto ARVR, Malagrino PA, Gois TC, et al. Serum metabolomics profile of type 2 diabetes mellitus in a Brazilian rural population. *Metabolomics*, 2016; <https://doi.org/10.1007/s11306-016-1107-5>
20. Klein S, Allison DB, Heymsfield SB, Kelley DE, Leibel RL, Nonas C, et al. Waist circumference and cardiometabolic risk: a consensus statement from shaping America's health: Association for Weight Management and Obesity Prevention; NAASO, the Obesity Society; the American Society for Nutrition; and the American Diabetes Association. *Diabetes Care*, 2007; <https://doi.org/10.2337/dc07-9921> PMID: 17360974
21. Nick TG, Campbell KM (2007). *Logistic Regression*. In *Topics in Biostatistics* (Ed. Ambrosius WT). Humana Press Inc., Totowa, NJ.
22. R Core Team. *R: a language and environment for statistical computing*. R Foundation for Statistical Computing, Vienna, Austria, 2019, <https://www.R-project.org>.
23. Wu J, Gong L, Li Q, Hu J, Zhang S, Wang Y, et al. A Novel Visceral Adiposity Index for Prediction of Type 2 Diabetes and Pre-diabetes in Chinese adults: A 5-year prospective study. *Scientific Reports*, 2017; <https://doi.org/10.1038/s41598-017-14251-w> PMID: 29062099
24. Flor LS, Campos MR. The prevalence of diabetes mellitus and its associated factors in the Brazilian adult population evidence from a population-based survey. *Rev Bras Epidemiol*. 2017; PMID: 28513791
25. Freitas ICM, Moraes SA. Social vulnerability effect over obesity anthropometric indexes: results from population-based epidemiological study. *Rev Bras Epidemiol*. 2016; PMID: 27532764
26. Hudish LI, Reusch JE, Sussel L. Beta-cell dysfunction during progression of metabolic syndrome to type 2 diabetes. *The J. of clinical investigation*, 2019 <https://doi.org/10.1172/JCI129188> PMID: 31424428
